# Supplementary material for: Game On? Smoking Cessation Through the Gamification of mHealth: A Longitudinal Qualitative Study
Source: PubMed Central journal article supplement (PMC5099502; doi:10.2196/games.5678), 2016-10-24
Supplement: games_v4i2e18_app5.pdf [file games_v4i2e18_app5.pdf]

**APPENDIX 5**

**Table 5: Participant concerns with illustrative quotes regarding gamified mHealth interventions.**

| <b>Concern</b>                                                                 | <b>Quote</b>                                                                                                                                                      | <b>Label</b> |
|--------------------------------------------------------------------------------|-------------------------------------------------------------------------------------------------------------------------------------------------------------------|--------------|
| Generalised achievements leading to lack of personalisation and self-relevance | “Smoking is personal and should not have premade incentives, people should generate their own incentives and the app should empower [them]”<br><b>22 Y/O Male</b> | 5A           |
|                                                                                | “Everyone’s incentives are different, the achievements don’t relate to me.”<br><b>19 Y/O Male</b>                                                                 | 5B           |
| Rewards and achievements eventually became tedious                             | “Achievements became slightly repetitive and need to be more creative”<br><b>33 Y/O Female</b>                                                                    | 5C           |
| Social media was not the medium to share your progress                         | “I actually think it [sharing on social media] is counterproductive. You do it for yourself not other people.”<br><b>38 Y/O Female</b>                            | 5D           |
